# Supplementary material for: Deep Functional and Molecular Characterization of a High-Risk Undifferentiated Pleomorphic Sarcoma
Source: Hindawi journal article supplement (doi:10.1155/2020/6312480), 2020-06-01
Supplement: f1 [file 6312480.f1.zip]

## Supplementary Figures

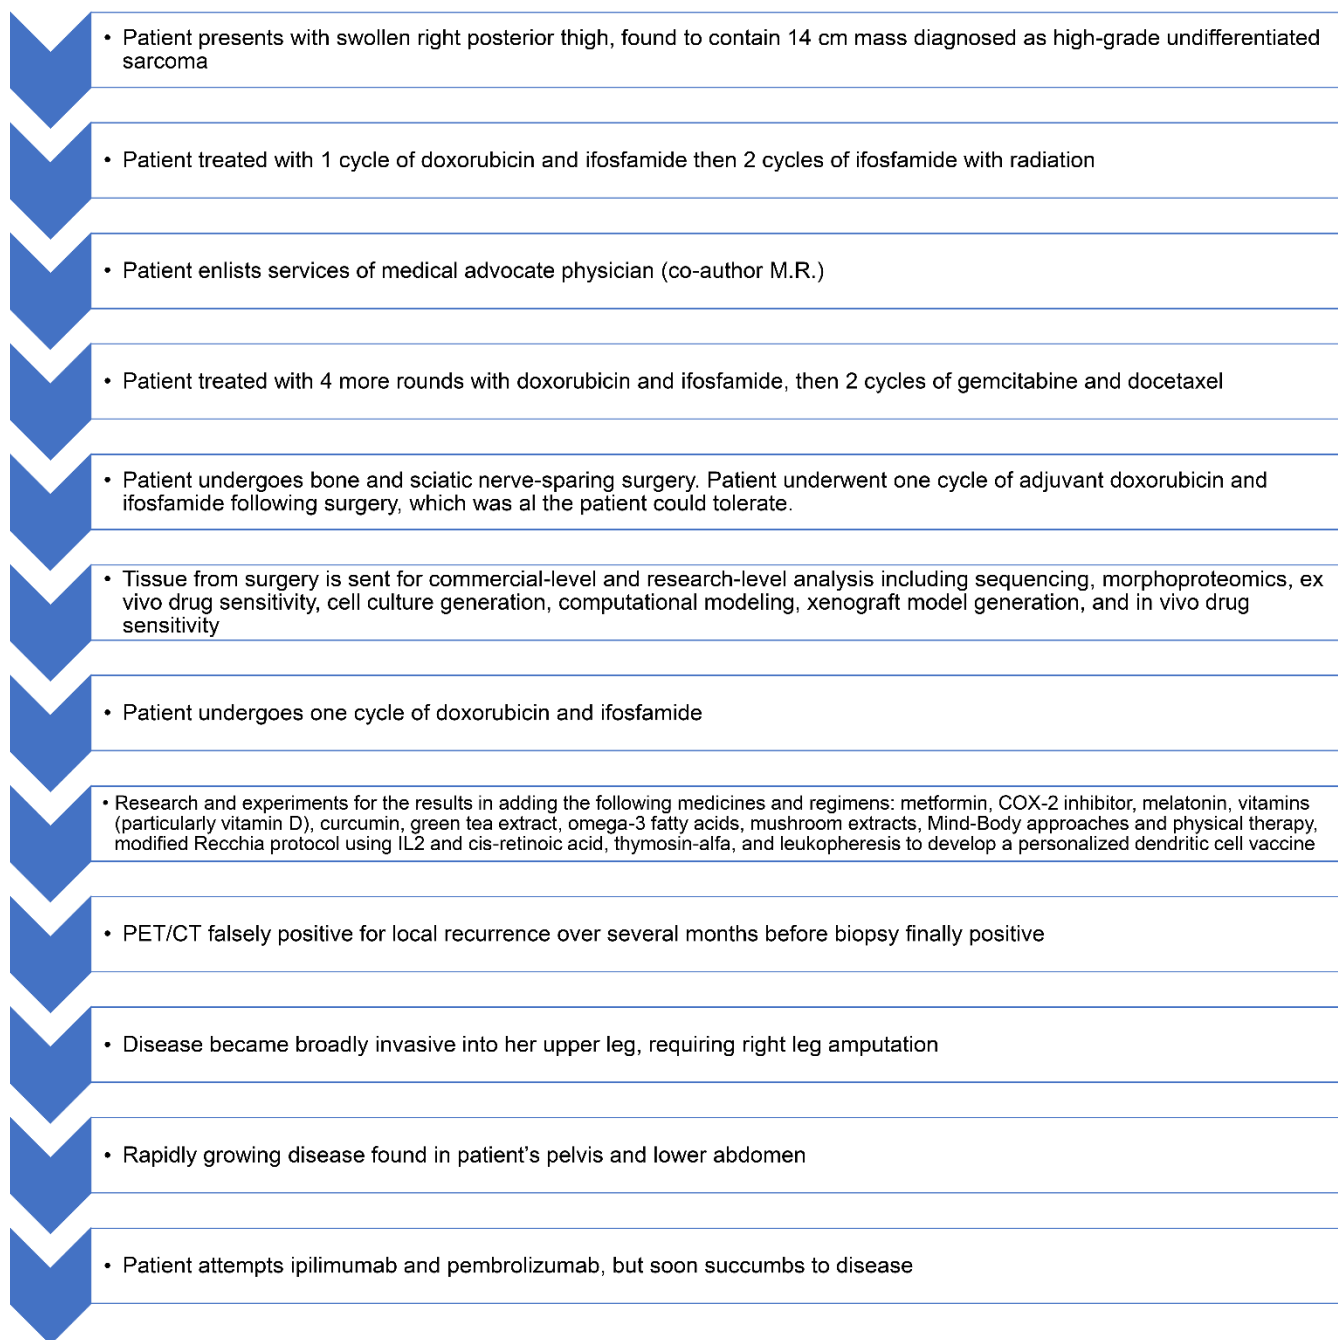

**Supplementary Figure 1.** Timeline of events described in this manuscript regarding patient care, commercial and research-level experiments, recurrence, and outcomes.
