# Supplementary material for: Deep Functional and Molecular Characterization of a High-Risk Undifferentiated Pleomorphic Sarcoma
Source: Sarcoma. 2020 May 4;2020:6312480. doi: 10.1155/2020/6312480 (PMC7285280; doi:10.1155/2020/6312480)
Supplement: Supplementary Materials — Supplementary Table 1. Commercial ex vivo assay results and concordance—table of results transcribed from two separate commercial ex vivo chemosensitivity assays performed for the patient. Provides comparison and concordance of results between commercial assays for agents tested on both commercial screens. Supplementary Table 2. Ex vivo assay results—results of ex vivo sensitivity assays from commercial services and the research-level ex vivo targeted therapy screen. Supplementary Table 3. PCB209 drug screen results—sensitivity results from the research-level ex vivo targeted therapy sensitivity assay. The same drug screen was tested both on primary PCB209 cancer cells, as well as cancer cells taken from the PCB209 patient-derived xenograft (PCB209X). Supplementary Table 4. DNA and RNA sequencing data—results from DNA sequencing experiments (identifying mutations and copy number variations) and RNA sequencing experiments (quantifying gene expression) aligned across individual genes. Supplementary Table 5. Morphoproteomics—results from consultative proteomics report performed for PCB209, detailing scores, and locations of analyzed proteins from immunohistochemical experiments. Supplementary Table 6. Merged drug screen and sequencing—merged and aligned data from DNA and RNA sequencing experiments and the PCB209 primary culture and patient-derived xenograft culture research-level drug screen results, organized at the drug and gene levels. Supplementary Figure 1. Timeline of events described in this manuscript regarding patient care, commercial and research-level experiments, recurrence, and outcomes. [file 6312480.f1.zip › 6312480.f1/Supplemental Table 1 - Commercial ex vivo assay results and concordance.xlsx]

## Sheet: Commercial ex vivo results
Weisenthal Cancer Group					Rational Therapeutics
Drug	Expected Response Rate	Assay Result	Assay Predicted Response Probability		Drug	IC50	Units	Concentration (uM)	Interpretation	Synergy
Cyclophosphamide(4HC)	15	Intermediate	15		Alpha-Interferon	<625	U	-	Sensitive	N/A
Ifosfamide(4HI)	15	Intermediate	15		Nitrogen Mustard	1.4	ug/ml	5.02	Intermediate	N/A
Melphalan	15	Intermediate	15		Bleomycin	6.8	ug/ml	4.5	Resistant	N/A
Dacarbazine	15	Sensitive	38		Doxorubicin	>1.2	ug/ml	>2.07	Resistant	N/A
Cisplatin	15	Intermediate	15		Vinctristine	0.6	ug/ml	0.65	Resistant	N/A
Oxaliplatin	15	Sensitive	38		Vorinostat	<1.3	ug/ml	<4.92	Active	N/A
Gemcitabine (Gemzar)	10	Intermediate	10		Crizotinib	3.7	ug/ml	8.22	Moderately Active	N/A
Cisplatin + Gemcitabine	20	Sensitive	47		BEZ235	1.7	ug/ml	3.62	Inactive	N/A
Dactinomycin	10	Resistant	2		Everolimus	>20	ug/ml	>20.87	Inactive	N/A
Doxorubicin	15	Intermediate	15		Geldanamycin	11	ug/ml	19.62	Inactive	N/A
Epirubicin	15	Intermediate	15		LY294002	8.7	ug/ml	28.31	Inactive	N/A
Etoposide	10	Resistant	2		Pazopanib	>40	ug/ml	>63.29	Inactive	N/A
Irinotecan	10	Resistant	2		Sunitinib	>13	ug/ml	>32.62	Inactive	N/A
Docetaxel (Taxotere)	10	Intermediate	10		Cisplatin + Gemcitabine	43	ug/ml	-	Resistant	N/A
Eribulin	10	Resistant	2		Gemcitabine + Taxol	92	ug/ml	-	Resistant	N/A
Gefitinib (Iressa)	-	Moderate direct antitumor, weak antivascular	-		Cyclophosphamide (Nitrogen Mustard) + Topotecan	0.9	ug/ml	-	Resistant	N/A
Imatinib (Gleevec)	-	Moderate direct antitumor, weak antivascular	-
Vismodegib	-	Moderate direct antitumor, weak antivascular	-
Erlotinib (Tarceva)	-	Moderate direct antitumor, weak antivascular	-
Sunitinib (Sutent)	-	Moderate direct antitumor, weak antivascular	-
Axitinib	-	Moderate direct antitumor, weak antivascular	-
Selumetinib	-	Moderate direct antitumor, weak antivascular	-
Vemurafenib	-	Moderate direct antitumor, weak antivascular	-
Temsirolimus (Torissel)	-	Moderate direct antitumor, weak antivascular	-
Everolimus	-	Weak direct antitumor, weak antivascular	-
Dasatinib	-	Weak direct antitumor, weak antivascular	-
Sorafenib	-	Weak direct antitumor, weak antivascular	-
Pazopanib	-	Weak direct antitumor, weak antivascular	-
Olaparib	-	Weak direct antitumor, weak antivascular	-
Lapatinib (Tykerb)	-	Weak direct antitumor, weak antivascular	-
Vinorelbine+Lapatinib	-	Strong, synergistic direct antitumor effect	-
Bevacizumab (Avastin)	-	Weak antivascular effect	-
Interleukin-2	-	Weak effector cell-mediated antitumor activity	-
Alpha-Interferon	-	Weak effector cell-mediated antitumor activity	-
GM-CSF	-	Weak effector cell-mediated antitumor activity	-
BCG	-	Moderate effector cell-mediated antitumor activity	-
ImuVert(S.marcescens)	-	Strong effector cell-mediated antitumor activity	-
Dihydroartemisinin+Holotransferrin	-	Strong direct antitumor activity	-
Phenylbutyrate	-	Strong direct antitumor activity	-
Anvirzel	-	Moderate direct antitumor activity	-

## Sheet: Commercial ex vivo concordance
	Weisenthal Report	Rational Therapeutics Report
Drug	Assay Result Interpretation	IC50	IC50 (uM)	Interpretation
Alpha-Interferon	Weak effector cell-mediated antitumor activity	<625 U	-	Sensitive			Consistent results/interpretation
Cisplatin + Gemcitabine	Sensitive	43 ug/ml	-	Resistant			Inconsistent interpretations, but potentially similar results
Cyclophosphamide(4HC)	Intermediate	1.4 ug/ml*	5.02 uM*	Intermediate*			Inconsistent results/interpretation
Doxorubicin	Intermediate	>1.2 ug/ml	>2.07 uM	Resistant
Everolimus	Weak direct antitumor, weak antivascular	>20 ug/ml	>20.87 uM	Inactive
Ifosfamide(4HI)	Intermediate	1.4 ug/ml*	5.02 uM*	Intermediate*
Pazopanib	Weak direct antitumor, weak antivascular	>30 ug/ml	>63.29 uM	Inactive
Sunitinib	Moderate direct antitumor, weak antivascular	>13 ug/ml	>32.62 uM	Inactive
	*Rational therapeutics tested an agent denoted Nitrogen Mustard as a surrogate for Cyclophophamide and Ifosfamide and related mustard alkylators
