# Supplementary material for: Deep Functional and Molecular Characterization of a High-Risk Undifferentiated Pleomorphic Sarcoma
Source: Sarcoma. 2020 May 4;2020:6312480. doi: 10.1155/2020/6312480 (PMC7285280; doi:10.1155/2020/6312480)
Supplement: Supplementary Materials — Supplementary Table 1. Commercial ex vivo assay results and concordance—table of results transcribed from two separate commercial ex vivo chemosensitivity assays performed for the patient. Provides comparison and concordance of results between commercial assays for agents tested on both commercial screens. Supplementary Table 2. Ex vivo assay results—results of ex vivo sensitivity assays from commercial services and the research-level ex vivo targeted therapy screen. Supplementary Table 3. PCB209 drug screen results—sensitivity results from the research-level ex vivo targeted therapy sensitivity assay. The same drug screen was tested both on primary PCB209 cancer cells, as well as cancer cells taken from the PCB209 patient-derived xenograft (PCB209X). Supplementary Table 4. DNA and RNA sequencing data—results from DNA sequencing experiments (identifying mutations and copy number variations) and RNA sequencing experiments (quantifying gene expression) aligned across individual genes. Supplementary Table 5. Morphoproteomics—results from consultative proteomics report performed for PCB209, detailing scores, and locations of analyzed proteins from immunohistochemical experiments. Supplementary Table 6. Merged drug screen and sequencing—merged and aligned data from DNA and RNA sequencing experiments and the PCB209 primary culture and patient-derived xenograft culture research-level drug screen results, organized at the drug and gene levels. Supplementary Figure 1. Timeline of events described in this manuscript regarding patient care, commercial and research-level experiments, recurrence, and outcomes. [file 6312480.f1.zip › 6312480.f1/Supplemental Table 3 - PCB209 Drug Screen Results.xlsx]

## Sheet: Research Level Screen Results
	Drug	FDA Status	Synonyms		Target	PCB-209 1*	PCB-209X
	barasertib		AZD1152-HQPA		Aurora kinase B	N/T	100000
	bortezomib	Approved	PS-341	Velcade	Proteasome	N/T	820.6
	decitabine	Approved	5-Aza-cytidine		DNA-methyl transferase	N/T	100000
	enzastaurin		LY317615		Protein Kinase Cβ	N/T	100000
	lapatinib	Approved	Lapatinib Ditosylate	Tykerb	Egfr, ErbB2	N/T	100000
	MLN8237		Alisertib		Aurora kinase A	100000	100000
	NAC	Approved	N-acetyl cysteine		Reactive oxygen species	N/T	100000
	pazopanib	Approved	Pazopanib Hydrochloride	GW-786034	VEGFRs, c-KIT, PDGFR beta	N/T	100000
	ponatinib		AP24534		BCR-ABL, VEGFR2, FGFR1, PDGFRα	100000	100000
	quinacrine	Approved	Quinacrine dihydrochloride	Atabrine	MAO, autophagy pathway	100000	4915.13
	RO4929097				Notch (gamma secretase)	100000	100000
	ruxolitinib		INCB018424		Jak1, Jak2	N/T	100000
	selumetinib		AZD6244		MEK1/2 inhibitor	N/T	100000
	SJ-172550				MDMX	100000	100000
	sodium butyrate	Approved			HDAC	100000	100000
	sorafenib	Approved	Sorafenib Tosylate	Bay 43-9006	VEGFR, PDGFR, RAF	N/T	6128.46
	SP600125				JNK 1,2 and 3	100000	100000
	temsirolimus	Approved	CCI-779		mTOR	N/T	100000
	veliparib		ABT-888		PARP-1 and PARP-2	N/T	100000
	vismodegib		GDC-0449		Smoothened (Hedgehog pathway)	N/T	100000
	zibotentan		ZD4054		Endothelin A receptor	100000	100000
	crizotinib	Approved	PF-2341066		C-Met, ALK	4873.23	5138.01
	GANT61				Hedgehog (Gli1)	100000	7378.2
	BMS 754807				Igf1r	N/T	1729.93
	OSI-906				Igf1r	N/T	100000
	MK-2206				Akt1,2,3	N/T	5493.24
	pelitinib		EKB-569		Egfr, ErbB2	100000	100000
	BIX 01294				Histone-lysine methyltransferase	N/T	6805.55
	tozasertib		VX-680	MK-0457	Aurora kinases	N/T	100000
	obatoclax		GX15-070	Obatoclax Mesylate	BCL2, BH3	100000	100000
	trichostatin		Trichostatin A	TSA	HDAC	N/T	5521.14
	cediranib		AZD2171		VEGFR, PDGFR, Kit	100000	100000
	dasatinib	Approved	BMS-354825		C-Kit, PDGFR, SFK, Bcr-Abl	N/T	100000
	panobinostat		LBH-589		HDAC	N/T	244.75
	SAHA	Approved	Vorinostat		HDAC	N/T	1967.44
	SNS-032		BMS-387032		CDK2, CDK7, CDK9	N/T	100000
	carfilzomib		PR-171		Proteasome	498.81	860.08
	Alvocidib		flavopiridol	NSC 649890	Cell Cycle(CDK Enzyme), Cell Cycle(CDK Protein)	5719.26	100000
	AUY922				Hsp90	N/T	1030.38
	AZD-8931				EGFR, ErbB2 and ErbB3	N/T	100000
	BEZ 235				PI3K, mTOR	N/T	100000
	Cabozantinib		XL-184		EGFR, c-Met	N/T	100000
	Cilengitide		EMD 121974		αvβ3 and αvβ5 integrins	100000	100000
	Dinaciclib		SCH-727965		CDK2, CDK5, CDK1, and CDK9	100000	100000
	Entinostat		SNDX-275	MS-275	HDAC 1,2	N/T	1789.13
	Fenretinide		4-HPR		retinoid receptor	N/T	100000
	Fostamatinib		R788		SYK kinase	N/T	5149.94
	Lenalidomide		Revlimid	CC-5013	Angiogenesis(VEGF - Unknown), Immune System	N/T	100000
	Nilotinib		AMN-107		PDGF-R, c-Kit, BCR-ABL	N/T	100000
	PF 562271				FAK/Pyk2 inhibitor	N/T	100000
	retinoic acid		Tretinoin	Vesanoid	differentiating agent	100000	100000
	RO5045337		Nutlin B	RG7112	MDM2	N/T	100000
	Saracatinib		AZD0530		Src Family Kinases	100000	100000
	SB-431542				TGF beta	N/T	100000
	Tamoxifen		4-hydroxy tamoxifen		estrogen receptor	N/T	100000
	Vandetanib		ZD6474		VEGFR-2, EGFR, RET	N/T	3037.85
	vemurafenib		PLX4032		BRAF	N/T	100000
	VER-155008				Hsp90, Hsp70	N/T	100000
	ABT 737				Bcl-xL, Bcl-2 and Bcl-w	N/T	2659.01
	SJ-172550				MDMX	N/T	100000
						19	60
						N/T = Not Tested
